# Supplementary material for: Atomic resolution structure of serine protease proteinase K at ambient temperature
Source: PubMed Central journal article supplement (PMC5374539; doi:10.1038/srep45604), 2017-03-31
Supplement: srep45604-s1.pdf [file srep45604-s1.pdf]

## **Supplementary Information**

# **Atomic resolution structure of serine protease proteinase K at ambient temperature**

Tetsuya Masuda, Mamoru Suzuki, Shigeyuki Inoue, Changyong Song, Takanori Nakane, Eriko Nango, Rie Tanaka, Kensuke Tono, Yasumasa Joti, Takashi Kameshima, Takaki Hatsui, Makina Yabashi, Bunzo Mikami, Osamu Nureki, Keiji Numata, So Iwata & Michihiro Sugahara

**a**

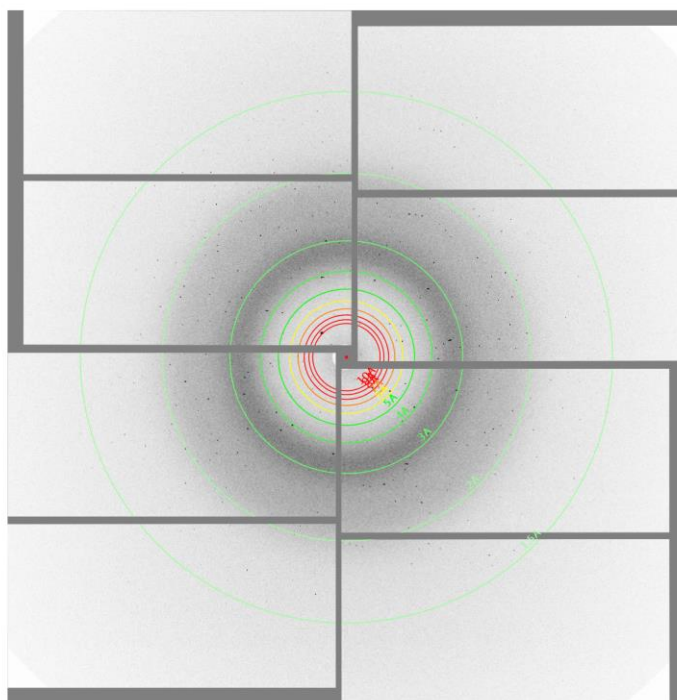

**b**

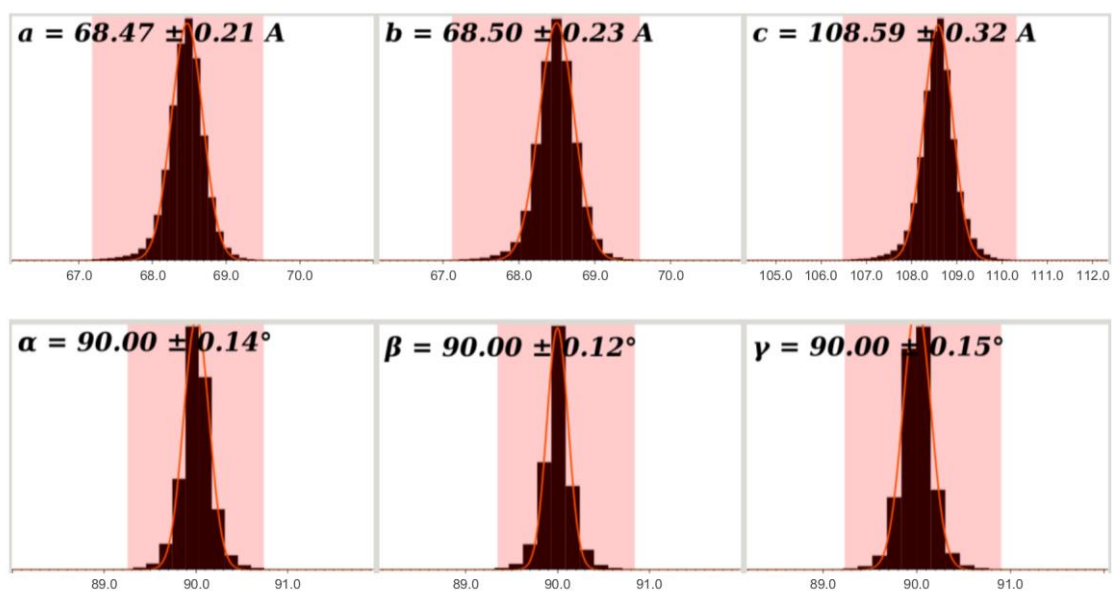

**Supplementary Figure 1 | A diffraction pattern and the distributions of unit cell parameters.** (a) A typical XFEL single diffraction pattern from an individual proteinase K microcrystal in hydroxyethyl cellulose. (b) The distributions of unit cell parameters resulting from processing a series of diffraction patterns.

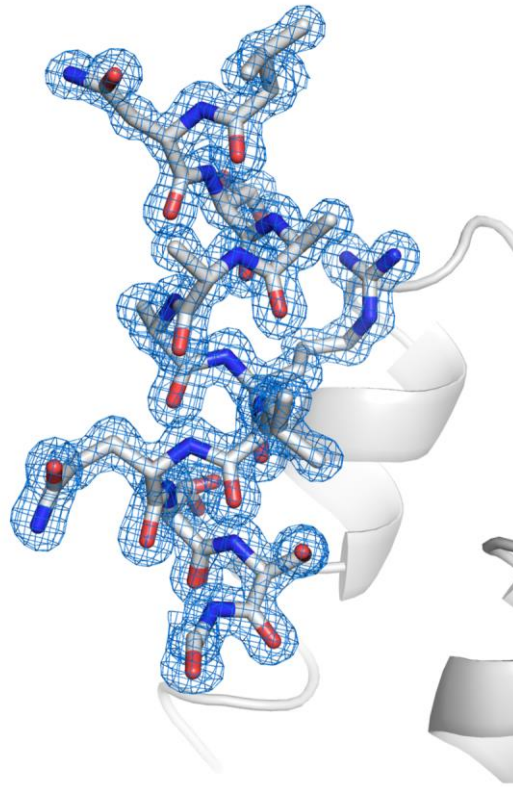

**Supplementary Figure 2 | A close-up view of the proteinase K structure with a  $2mF_o-DF_c$  electron-density map contoured at the  $1.5\sigma$  level.**

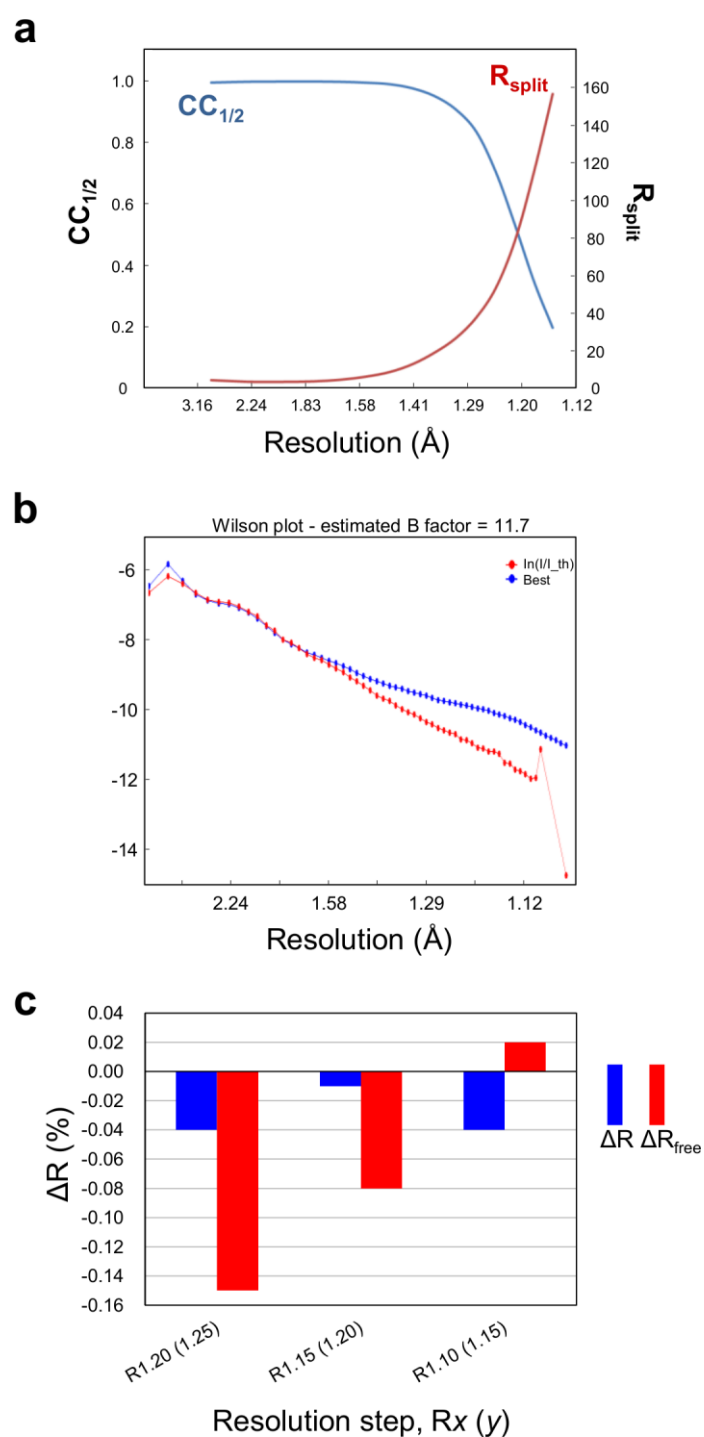

**Supplementary Figure 3 | ‘High resolution limit’ of SFX structure.** (a) Plots of  $CC_{1/2}$  and  $R_{\text{split}}$  against resolution. (b) Wilson plot. (c) Results of paired refinement. Rx (y) means that R values calculated at y Å resolution with the model refined at y Å resolution were compared with those using the model refined at x Å resolution.

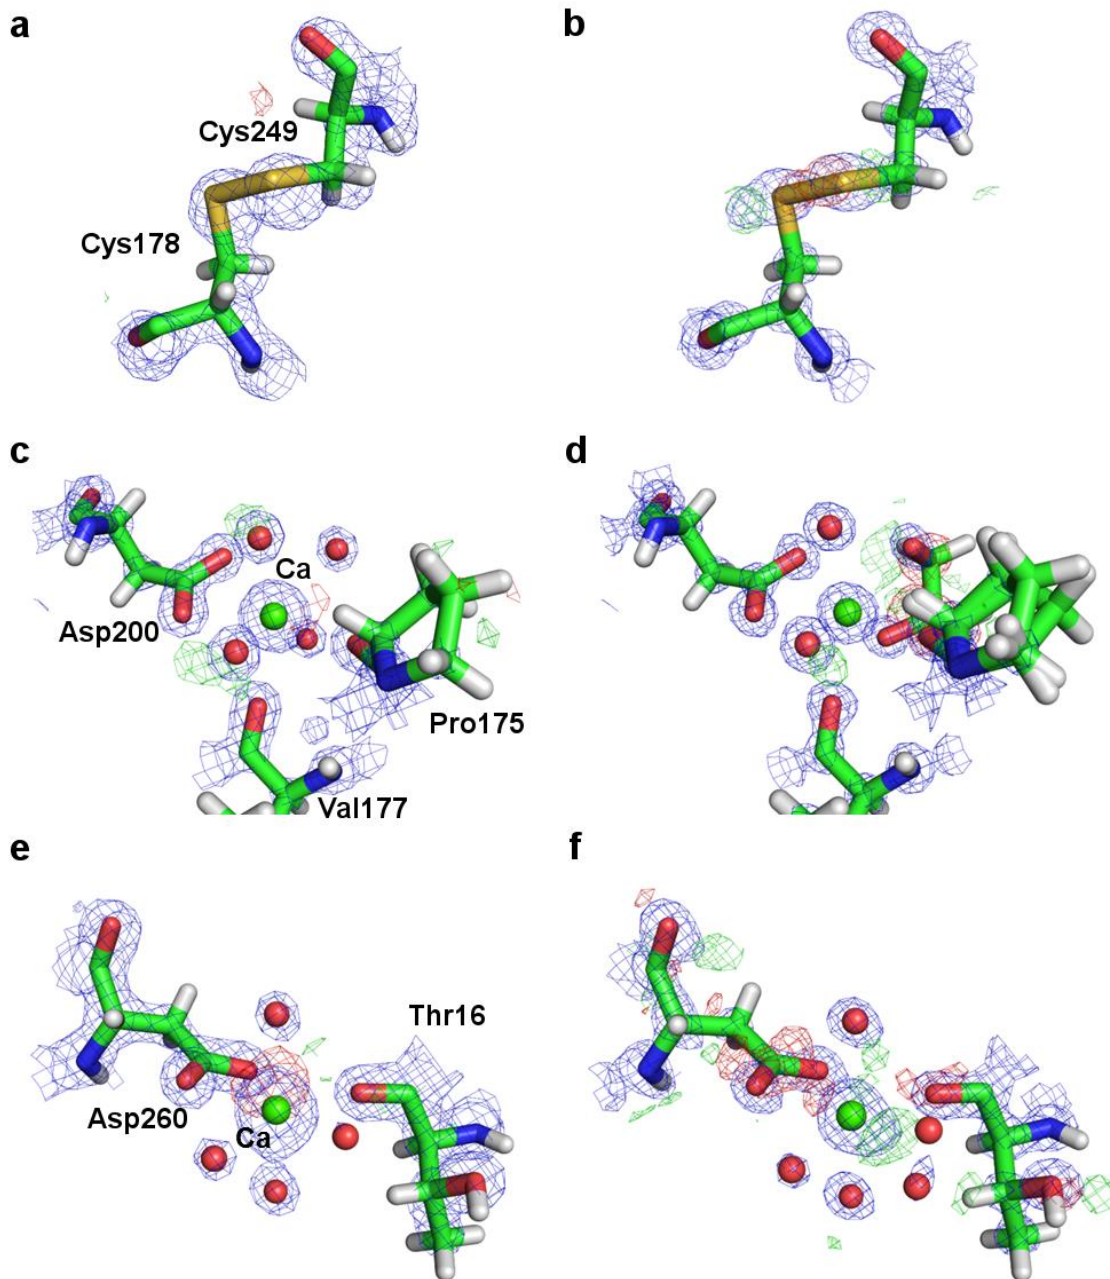

**Supplementary Figure 4 | Comparison of SFX and SRX in disulfide linkage as well as Ca binding sites that are susceptible to radiation damage.** Difference maps of disulfide linkages between Cys178 and Cys249 in (a) SFX structure and (b) SRX structure. No negative and/or positive peaks are detected in the SFX structure, whereas both negative and positive peaks are observed in the SRX structure. Electron density maps around two Ca-binding sites in SFX (c,e) and SRX (d,f). Unusual peaks were not detected in the SFX structure, whereas, some unusual negative peaks were found in the SRX structure. The  $\sigma_A$ -weighted  $2mF_o - DF_c$  maps contoured at  $2.0\sigma$  (a,b,e,f) or  $3.0\sigma$  (c,d) are shown in blue and  $mF_o - DF_c$  maps contoured at  $3.0\sigma$  and  $-3.0\sigma$  are shown in green and red, respectively.

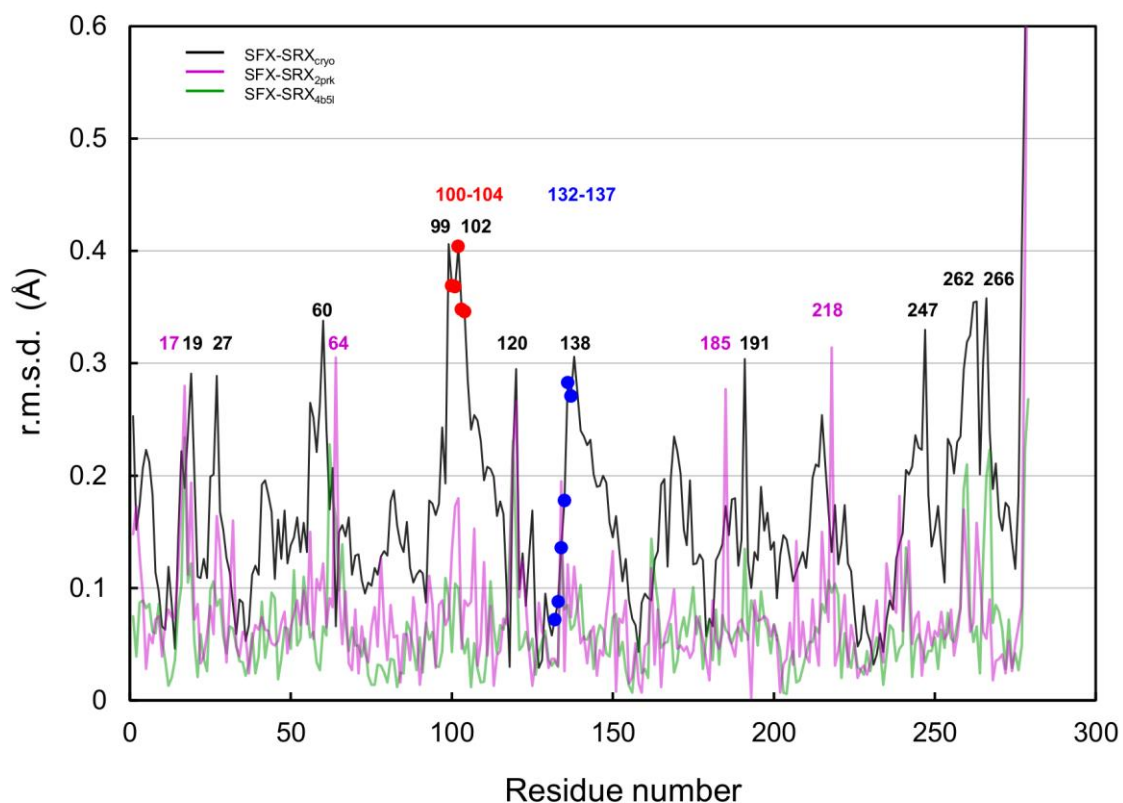

**Supplementary Figure 5 | R.m.s.d. differences between SFX and SRX structures.** The differences between SFX and SRX at cryo temperature (black line), (b) between SFX and SRX (2prk) at room temperature (pink line), and between SFX and SRX (4b5l) at room temperature (green line). Structures of SFX and SRX are superposed and the main-chain r.m.s.d, value was plotted against the residue number. One of the substrate binding sites (Gly100–Tyr104) is shown in red, and the other substrate binding site, Ser132–Tyr137, is shown in blue.

**Supplementary Table 1 | Statistics for the processing of the diffraction data for SFX.**

| Center<br>1/nm | # refs | Possible | Compl | Meas     | Red    | SNR   | Std dev | Mean    | d(A) | Min 1/nm | Max 1/nm |
|----------------|--------|----------|-------|----------|--------|-------|---------|---------|------|----------|----------|
| 1.874          | 5826   | 5826     | 100   | 16202738 | 2781.1 | 23.16 | 4524.90 | 4840.32 | 5.34 | 0.368    | 3.380    |
| 3.819          | 5536   | 5536     | 100   | 10183529 | 1839.5 | 27.79 | 2341.81 | 2154.56 | 2.62 | 3.380    | 4.258    |
| 4.566          | 5487   | 5487     | 100   | 8217270  | 1497.6 | 28.77 | 1431.20 | 1325.65 | 2.19 | 4.258    | 4.874    |
| 5.119          | 5418   | 5418     | 100   | 6913463  | 1276.0 | 26.25 | 764.77  | 715.85  | 1.95 | 4.874    | 5.364    |
| 5.571          | 5412   | 5412     | 100   | 6716219  | 1241.0 | 22.66 | 388.49  | 362.21  | 1.79 | 5.364    | 5.778    |
| 5.959          | 5401   | 5401     | 100   | 6373132  | 1180.0 | 18.20 | 229.76  | 211.9   | 1.68 | 5.778    | 6.140    |
| 6.302          | 5371   | 5371     | 100   | 6056897  | 1127.7 | 14.52 | 150.22  | 143.39  | 1.59 | 6.140    | 6.464    |
| 6.611          | 5377   | 5377     | 100   | 5824101  | 1083.2 | 11.06 | 100.54  | 95.25   | 1.51 | 6.464    | 6.758    |
| 6.893          | 5353   | 5353     | 100   | 5602944  | 1046.7 | 7.90  | 65.27   | 61.45   | 1.45 | 6.758    | 7.029    |
| 7.154          | 5361   | 5361     | 100   | 5434722  | 1013.8 | 5.70  | 44.02   | 41.09   | 1.40 | 7.029    | 7.280    |
| 7.397          | 5344   | 5344     | 100   | 5252900  | 983.0  | 4.37  | 32.10   | 29.87   | 1.35 | 7.280    | 7.515    |
| 7.625          | 5312   | 5312     | 100   | 5001867  | 941.6  | 3.30  | 23.63   | 21.51   | 1.31 | 7.515    | 7.736    |
| 7.841          | 5357   | 5357     | 100   | 4236507  | 790.8  | 2.46  | 18.48   | 16.15   | 1.28 | 7.736    | 7.945    |
| 8.045          | 5334   | 5334     | 100   | 3043739  | 570.6  | 1.80  | 14.55   | 12.58   | 1.24 | 7.945    | 8.144    |
| 8.239          | 5307   | 5307     | 100   | 2243599  | 422.8  | 1.26  | 12.45   | 9.57    | 1.21 | 8.144    | 8.333    |

**Supplementary Table 2 | The observed hydrogen atoms in  $\alpha$ -helices  $\alpha$ 3– $\alpha$ 5 in SFX and SRX structures.** Hydrogen atom positions found only in SFX (colored red) and SRX (colored blue).

| Hydrogen Bonds in Helix $\alpha$ 3 |   |   |      |     |   | Hydrogen Bonds in Helix $\alpha$ 4 |   |     |      |   |   | Hydrogen Bonds in Helix $\alpha$ 5 |     |     |      |   |   |
|------------------------------------|---|---|------|-----|---|------------------------------------|---|-----|------|---|---|------------------------------------|-----|-----|------|---|---|
|                                    |   |   | SFX  | SRX |   |                                    |   | SFX | SRX  |   |   |                                    | SFX | SRX |      |   |   |
| D117                               | N | O | F113 | H   | H | S151                               | N | O   | R147 | H | H | K242                               | N   | O   | L237 | H | - |
| S116                               | N | O | F113 | H   | - | S150                               | N | O   | A146 | H | - | G241                               | N   | O   | M238 | H | H |
| S116                               | N | O | D112 | H   | - | Q149                               | N | O   | A145 | H | - | G241                               | N   | O   | L237 | H | H |
| A115                               | N | O | M111 | -   | - | L148                               | N | O   | A144 | H | - | L240                               | N   | O   | Y236 | H | - |
| V114                               | N | O | G110 | -   | H | R147                               | N | O   | S143 | - | - | T239                               | N   | O   | A235 | H | H |
| F113                               | N | O | A109 | H   | H | A146                               | N | O   | N142 | - | - | M238                               | N   | O   | A234 | H | H |
| D112                               | N | O | I108 | -   | - | A145                               | N | O   | V141 | H | H | L237                               | N   | O   | L233 | H | - |
| M111                               | N | O | I107 | H   | H | A144                               | N | O   | S140 | - | H | Y236                               | N   | O   | G232 | H | H |
| G110                               | N | O | T106 | -   | - | S143                               | N | O   | S139 | - | H | A235                               | N   | O   | A231 | - | H |
| A109                               | N | O | S105 | H   | H | N142                               | N | O   | S138 | H | - | A234                               | N   | O   | V230 | - | - |
| I108                               | N | O | Y104 | -   | - |                                    |   |     |      |   |   | L233                               | N   | O   | H229 | H | H |
| I107                               | N | O | Q103 | -   | - |                                    |   |     |      |   |   | G232                               | N   | O   | P228 | - | - |
| T106                               | N | O | Q103 | -   | - |                                    |   |     |      |   |   |                                    |     |     |      |   |   |
